# Supplementary material
Source: Research Square preprint supplement (doi:10.21203/rs.3.rs-9658907/v1)
Supplement: Supplementary file 1 [file db87a35d99308ce735c713b9.docx]

**Supplementary Appendix 1: Coding Definitions (ICD-10, CPT, and LOINC Codes)**

**ICD-10 Codes**

Colorectal Cancer (CRC):

C18 (Malignant neoplasm of colon)

C19 (Rectosigmoid junction)

C20 (Rectum)

D01.0–D01.2 (Carcinoma in situ of colon/rectum)

Exclusion Diagnoses:

K50 (Crohn’s disease)

K51 (Ulcerative colitis)

D13.91 (Familial adenomatous polyposis)

Z15.09 (Genetic susceptibility to malignancy)

Screening Encounters:

Z12.11 (Screening for colon cancer)

Z12.12 (Screening for rectal cancer)

**CPT Codes (Colonoscopy)**

45378 (Diagnostic colonoscopy)

45380 (Colonoscopy with biopsy)

45381 (Colonoscopy with injection)

45385 (Colonoscopy with polypectomy)

**LOINC Codes**

29771-3 (Fecal immunochemical test – hemoglobin in stool)

**Supplementary Appendix 2: Outcome Definitions**

Colorectal Cancer (CRC)

Defined using ICD-10 codes:

C18 (colon)

C19 (rectosigmoid junction)

C20 (rectum)

D01.x (carcinoma in situ)

Polyps

Defined using:

K63.5 (colon polyp)

D12 (benign neoplasm of colon/rectum)

K62.1 (rectal polyp)

All-Cause Mortality

Defined as recorded death in the TriNetX database.

**Supplementary Appendix 3: Baseline Characteristics Before and After Matching for Comparison of Colonoscopy Completion vs Non-Completion at 1 Year**

# Supplementary Table 1. Baseline Characteristics Before Matching

| Variable | Colonoscopy (n=15,739) | No Colonoscopy (n=18,021) | p-value |
| --- | --- | --- | --- |
| Female (%) | 49.8 | 51.5 | 0.002 |
| Male (%) | 50.2 | 48.5 | 0.002 |
| White (%) | 74.4 | 79.1 | <0.001 |
| Black (%) | 14.4 | 9.8 | <0.001 |
| Hispanic (%) | 11.6 | 8.1 | <0.001 |
| Diabetes (%) | 32.5 | 31.7 | 0.102 |
| Hypertension (%) | 70.8 | 69.9 | 0.056 |
| CKD (%) | 14.4 | 14.5 | 0.831 |

# Supplementary Table 2. Baseline Characteristics After Matching

| Variable | Colonoscopy (n=14,677) | No Colonoscopy (n=14,677) | p-value |
| --- | --- | --- | --- |
| Female (%) | 49.6 | 49.1 | 0.421 |
| Male (%) | 50.4 | 50.9 | 0.414 |
| White (%) | 77.5 | 78.9 | 0.004 |
| Black (%) | 11.2 | 10.9 | 0.424 |
| Hispanic (%) | 9.8 | 9.8 | 0.984 |
| Diabetes (%) | 32.1 | 32.3 | 0.617 |
| Hypertension (%) | 70.5 | 70.9 | 0.505 |
| CKD (%) | 14.4 | 14.4 | 0.960 |

**Supplementary Appendix 4: Baseline Characteristics Before and After Matching for Comparison of Colonoscopy Completion vs non-completion at 10 Years**

# Supplementary Table 3. Baseline Characteristics Before Matching

| Variable | Colonoscopy (n=15,739) | No Colonoscopy (n=18,021) | p-value |
| --- | --- | --- | --- |
| Female (%) | 49.8 | 51.5 | 0.002 |
| Male (%) | 50.2 | 48.5 | 0.002 |
| White (%) | 74.4 | 79.1 | <0.001 |
| Black (%) | 14.4 | 9.8 | <0.001 |
| Hispanic (%) | 11.6 | 8.1 | <0.001 |
| Diabetes (%) | 32.5 | 31.7 | 0.102 |
| Hypertension (%) | 70.8 | 69.9 | 0.056 |
| CKD (%) | 14.4 | 14.5 | 0.831 |

# Supplementary Table 4. Baseline Characteristics After Matching

| Variable | Colonoscopy (n=14,677) | No Colonoscopy (n=14,677) | p-value |
| --- | --- | --- | --- |
| Female (%) | 49.6 | 49.1 | 0.421 |
| Male (%) | 50.4 | 50.9 | 0.414 |
| White (%) | 77.5 | 78.9 | 0.004 |
| Black (%) | 11.2 | 10.9 | 0.424 |
| Hispanic (%) | 9.8 | 9.8 | 0.984 |
| Diabetes (%) | 32.1 | 32.3 | 0.617 |
| Hypertension (%) | 70.5 | 70.9 | 0.505 |
| CKD (%) | 14.4 | 14.4 | 0.960 |

**Supplementary Appendix 5: Baseline Characteristics Before and After Matching for Comparison of Colonoscopy Adherence, Polyp Detection, and Colorectal Cancer Detection Across Demographic Groups Following Positive FIT**

Age 51-65 vs 45-50

# Supplementary Table 5. Baseline Characteristics Before Matching

| Variable | Age 51–64 (n=20,069) | Age 45–50 (n=4,078) | p-value |
| --- | --- | --- | --- |
| Female (%) | 48.0 | 50.3 | 0.007 |
| Male (%) | 51.9 | 49.6 | 0.006 |
| White (%) | 73.2 | 66.0 | <0.001 |
| Black (%) | 14.7 | 17.5 | <0.001 |
| Hispanic (%) | 10.6 | 14.4 | <0.001 |
| Asian (%) | 3.6 | 5.5 | <0.001 |
| Other Race (%) | 4.5 | 7.0 | <0.001 |

# Supplementary Table 6. Baseline Characteristics After Matching

| Variable | Age 51–64 (n=4,077) | Age 45–50 (n=4,077) | p-value |
| --- | --- | --- | --- |
| Female (%) | 50.4 | 50.4 | 1.000 |
| Male (%) | 49.6 | 49.6 | 1.000 |
| White (%) | 66.0 | 66.0 | 1.000 |
| Black (%) | 17.5 | 17.5 | 1.000 |
| Hispanic (%) | 14.4 | 14.4 | 1.000 |
| Asian (%) | 5.5 | 5.5 | 1.000 |
| Other Race (%) | 7.0 | 7.0 | 1.000 |

Age 51-65 vs 65-80

# Supplementary Table 7. Baseline Characteristics Before Matching

| Variable | Age 51–64 (n=20,069) | Age 65–85 (n=20,987) | p-value |
| --- | --- | --- | --- |
| Female (%) | 48.0 | 51.1 | <0.001 |
| Male (%) | 51.9 | 48.9 | <0.001 |
| White (%) | 73.2 | 80.3 | <0.001 |
| Black (%) | 14.7 | 10.2 | <0.001 |
| Hispanic (%) | 10.6 | 5.2 | <0.001 |
| Asian (%) | 3.6 | 3.5 | 0.815 |
| Other Race (%) | 4.5 | 3.2 | <0.001 |

# Supplementary Table 8. Baseline Characteristics After Matching

| Variable | Age 51–64 (n=18,111) | Age 65–85 (n=18,111) | p-value |
| --- | --- | --- | --- |
| Female (%) | 48.3 | 48.4 | 0.966 |
| Male (%) | 51.6 | 51.6 | 0.975 |
| White (%) | 77.7 | 77.5 | 0.687 |
| Black (%) | 11.8 | 11.8 | 0.987 |
| Hispanic (%) | 6.0 | 6.0 | 1.000 |
| Asian (%) | 3.9 | 4.0 | 0.787 |
| Other Race (%) | 3.4 | 3.5 | 0.510 |

Ethnicity Hispanic vs Non-Hispanic

# Supplementary Table 9. Baseline Characteristics Before Matching

| Variable | Hispanic (n=3,780) | Non-Hispanic (n=33,863) | p-value |
| --- | --- | --- | --- |
| Age (mean ± SD) | 59.3 ± 8.9 | 64.0 ± 9.9 | <0.001 |
| Female (%) | 53.6 | 49.9 | <0.001 |
| Male (%) | 46.3 | 50.1 | <0.001 |
| Unknown Gender (%) | 0.3 | 0.0 | <0.001 |

# Supplementary Table 10. Baseline Characteristics After Matching

| Variable | Hispanic (n=3,778) | Non-Hispanic (n=3,778) | p-value |
| --- | --- | --- | --- |
| Age (mean ± SD) | 59.3 ± 8.8 | 59.3 ± 8.8 | 0.993 |
| Female (%) | 53.6 | 53.6 | 0.982 |
| Male (%) | 46.3 | 46.3 | 1.000 |
| Unknown Gender (%) | 0.3 | 0.3 | 1.000 |

Race White vs Asian

# Supplementary Table 11. Baseline Characteristics Before Matching

| Variable | White (n=34,993) | Asian (n=1,739) | p-value |
| --- | --- | --- | --- |
| Age (mean ± SD) | 64.4 ± 10.0 | 62.7 ± 10.7 | <0.001 |
| Female (%) | 49.2 | 50.3 | 0.374 |
| Male (%) | 50.8 | 49.7 | 0.382 |
| Unknown Gender (%) | 0.0 | 0.0 | 0.481 |

# Supplementary Table 12. Baseline Characteristics After Matching

| Variable | White (n=1,739) | Asian (n=1,739) | p-value |
| --- | --- | --- | --- |
| Age (mean ± SD) | 62.7 ± 10.7 | 62.7 ± 10.7 | 1.000 |
| Female (%) | 50.3 | 50.3 | 1.000 |
| Male (%) | 49.7 | 49.7 | 1.000 |
| Unknown Gender (%) | 0.0 | 0.0 | -- |

Race White vs Black

# Supplementary Table 13. Baseline Characteristics Before Matching

| Variable | White (n=34,527) | Black (n=5,807) | p-value |
| --- | --- | --- | --- |
| Age (mean ± SD) | 64.4 ± 10.0 | 61.4 ± 9.5 | <0.001 |
| Female (%) | 49.1 | 55.3 | <0.001 |
| Male (%) | 50.9 | 44.6 | <0.001 |
| Unknown Gender (%) | 0.0 | 0.2 | <0.001 |

# Supplementary Table 14. Baseline Characteristics After Matching

| Variable | White (n=5,804) | Black (n=5,804) | p-value |
| --- | --- | --- | --- |
| Age (mean ± SD) | 61.4 ± 9.5 | 61.4 ± 9.5 | 0.981 |
| Female (%) | 55.3 | 55.3 | 0.985 |
| Male (%) | 44.7 | 44.6 | 0.955 |
| Unknown Gender (%) | 0.2 | 0.2 | 1.000 |

Race White vs American Indian/Alaska Native

# Supplementary Table 15. Baseline Characteristics Before Matching

| Variable | White (n=34,993) | AI/AN (n=179) | p-value |
| --- | --- | --- | --- |
| Age (mean ± SD) | 64.4 ± 9.98 | 60.4 ± 9.11 | <0.001 |
| Female (%) | 49.167 | 53.073 | <0.001 |
| Male (%) | 50.816 | 46.927 | <0.001 |
| Unknown (%) | 0.029 | 0.0 | <0.001 |

# Supplementary Table 16. Baseline Characteristics After Matching

| Variable | White (n=179) | AI/AN (n=179) | p-value |
| --- | --- | --- | --- |
| Age (mean ± SD) | 60.4 ± 9.11 | 60.4 ± 9.11 | 1.000 |
| Female (%) | 53.073 | 53.073 | 1.000 |
| Male (%) | 46.927 | 46.927 | 1.000 |
| Unknown (%) | 0.0 | 0.0 | -- |

Race White vs Native Hawaiian/Other Pacific Islander

# Supplementary Table 17. Baseline Characteristics Before Matching

| Variable | White (n=34,993) | Native Hawaiian/Other Pacific Islander (n=203) | p-value |
| --- | --- | --- | --- |
| Age (mean ± SD) | 64.4 ± 9.98 | 62.3 ± 9.17 | <0.001 |
| Female (%) | 49.167 | 55.665 | <0.001 |
| Male (%) | 50.816 | 44.335 | <0.001 |
| Unknown (%) | 0.029 | 0.0 | <0.001 |

# Supplementary Table 18. Baseline Characteristics After Matching

| Variable | White (n=203) | Native Hawaiian/Other Pacific Islander (n=203) | p-value |
| --- | --- | --- | --- |
| Age (mean ± SD) | 62.3 ± 9.17 | 62.3 ± 9.17 | 1.000 |
| Female (%) | 55.665 | 55.665 | 1.000 |
| Male (%) | 44.335 | 44.335 | 1.000 |
| Unknown (%) | 0.0 | 0.0 | — |
